# Supplementary material for: Deciphering Molecular Aspects of Potential α-Glucosidase Inhibitors within Aspergillus terreus: A Computational Odyssey of Molecular Docking-Coupled Dynamics Simulations and Pharmacokinetic Profiling
Source: MDPI journal article supplement (doi:10.3390/metabo13080942), 2023-08-12
Supplement: s1 [file s1]

# Deciphering Molecular Aspects of Potential $\alpha$ -Glucosidase Inhibitors within *Aspergillus terreus*: A Computational Odyssey

## Supporting data

Table S1. Designated chemical library of *Aspergillus terreus*-isolated metabolites

| Compound name;<br>Isomeric SMILES                                                                                               | Ligand<br>Code | MW     | TPSA   |
|---------------------------------------------------------------------------------------------------------------------------------|----------------|--------|--------|
| <b>2<i>R</i>-(<i>-</i>)-6-hydroxymellein</b><br>O=C1C2=C(C=C(O)C=C2O)C[C@@H](C)O1                                               | SK-001         | 194.19 | 66.76  |
| <b>(<i>-</i>)-(3<i>R</i>)-6-methoxymellein</b><br>O=C1C2=C(C=C(OC)C=C2O)C[C@@H](C)O1                                            | SK-002         | 208.21 | 55.77  |
| <b>6-(4'-hydroxy-2'-methyl phenoxy)-(<i>-</i>)-(3<i>R</i>)-mellein</b><br>O=C1C2=C(C=C(OC3=CC=C(O)C=C3C)C=C2O)C[C@@H](C)O1      | SK-003         | 300.31 | 76.00  |
| <b>(3<i>R</i>,4<i>R</i>)-6,7-dimethoxy-4-hydroxymellein</b><br>O=C1C2=C(C=C(OC)C(OC)=C2O)[C@@H](O)[C@@H](C)O1                   | SK-004         | 254.24 | 85.23  |
| <b>Asperterrestide B</b><br>O=C([C@@H]([C@@H](O)C1=CC=CC=C1)N(C)C([C@@H](C(C)C)NC([C@@H](C)N2)=O)=O)NC3=CC=CC=C3C2=O            | SK-005         | 466.54 | 127.83 |
| <b>Asperterrestide A</b><br>O=C([C@@H]([C@@H](O)C1=CC=CC=C1)N(C)C([C@@H](C(CC)C)NC([C@@H](C)N2)=O)=O)NC3=CC=CC=C3C2=O           | SK-006         | 480.56 | 127.83 |
| <b>Arisugasin H</b><br>CC(O[C@@H]1C[C@H](O)[C@]2(C)[C@@]3(O)CC4=C(C=C(C5=CC=C(OC)C=C5)OC4=O)O[C@]3(C)CC[C@@]2(O)C1(C)C)=O       | SK-007         | 526.60 | 135.67 |
| <b>Arisugasin D</b><br>CC(O[C@@H]1CC[C@]2(C)[C@@]3(O)CC4=C(C=C(C5=CC=C(OC)C=C5)OC4=O)O[C@]3(C)CC[C@@]2(O)C1(C)C)=O              | SK-008         | 512.60 | 115.44 |
| <b>Terretrione B</b><br>O=C(C(C(C)C)N(C)C(C1CC2=CC=CC=C2)=O)N(C)C1=O                                                            | SK-009         | 302.37 | 57.69  |
| <b>Terretrione C</b><br>O=C(C(C(CC)C)N(C)C(C1CC2=CC=CC=C2)=O)N(C)C1=O                                                           | SK-010         | 316.40 | 57.69  |
| <b>1-methyl emodin</b><br>O=C1C2=C(C=C(C)C=C2OC)C(C3=CC(O)=CC(O)=C13)=O                                                         | SK-011         | 284.27 | 83.83  |
| <b>Aspernolide A</b><br>O=C([C@](C(C1=CC=C(O)C=C1)=C2O)(CC3=CC(CCC(C)(C)O4)=C4C=C3)OC2=O)OC                                     | SK-012         | 424.45 | 102.30 |
| <b>Aspernolide F</b><br>O=C([C@](C(C1=CC=C(O)C=C1)=C2OCC)(CC3=CC=C(O)C(C/C=C(C)\C)=C3)OC2=O) OC                                 | SK-013         | 452.50 | 102.30 |
| <b>Aspernolide B</b><br>CC(C)(CCC1=C(C=CC(=C1)C[C@@]2(C(=C(C(=O)O2)O)C3=CC=C(C=C3)O)C(=O)OC) O)O                                | SK-014         | 442.46 | 133.52 |
| <b>Aspernolide C</b><br>CC(C)(CCC1=C(C=CC(=C1)C[C@@]2(C(=C(C(=O)O2)O)C3=CC=C(C=C3)O)C(=O)OC) O)OC                               | SK-015         | 456.49 | 122.53 |
| <b>Aspernolide E</b><br>O=C([C@](C(C1=CC=C(O)C=C1)=C2O)(CC3=CC(C=CC(C)(C)O4)=C4C=C3)OC2=O)OC                                    | SK-016         | 422.43 | 102.30 |
| <b>Aspernolide G</b><br>O=C([C@](C(C1=CC=C(O)C=C1)=C2OCC)(CC3=CC=C(O)C[C@H](O)C(C)(O)C)=C3)OC2=O)OC                             | SK-017         | 486.52 | 142.76 |
| <b>1,8-dihydroxy-3-methoxy-6-methylanthracene-9,10-dione</b><br>O=C1C2=C(C=C(C)C=C2O)C(C3=CC(OC)=CC(O)=C13)=O                   | SK-018         | 284.27 | 83.83  |
| <b>Methyl, 6-acetyl-4-methoxy-5,8-dihydroxynaphthalene-2-carboxylate</b><br>O=C(C1=CC(OC)=C2C(O)=C(C(C)=O)C=C(O)C2=C1)OC        | SK-019         | 290.27 | 93.07  |
| <b>Methyl, 6-acetyl-4- methoxy-5,7,8-trihydroxynaphthalene-2-carboxylate</b><br>O=C(C1=CC(OC)=C2C(O)=C(C(C)=O)C(O)=C(O)C2=C1)OC | SK-020         | 306.27 | 113.29 |

|                                                                                                                 |        |        |        |
|-----------------------------------------------------------------------------------------------------------------|--------|--------|--------|
| <b>Stigmasta-4,6,8(14), 22-tetraen-3-one</b>                                                                    | SK-021 | 406.65 | 17.07  |
| <chem>CC[C@@H](C(C)C)/C=C/[C@@H](C)[C@H]1CCC2=C3C=CC4=CC(CC[C@]4(C)[C@@]3([H]))CC[C@]12C=O</chem>               |        |        |        |
| <b>Stigmast-4-ene-3-one</b>                                                                                     | SK-022 | 412.70 | 17.07  |
| <chem>CC[C@@H](C(C)C)CC[C@@H](C)[C@H]1CC[C@@]2([H])[C@]3([H])CCC4=CC(CC[C@]4(C)[C@@]3([H]))CC[C@]12C=O</chem>   |        |        |        |
| <b>(22E,24R)-stigmasta-5,7,22-trien-3-beta-ol</b>                                                               | SK-023 | 410.69 | 20.23  |
| <chem>CC[C@H](C(C)C)/C=C/[C@@H](C)[C@H]1CC[C@@]2([H])C3=CC=C4C[C@@H](O)CC[C@]4(C)[C@@]3([H])CC[C@]12C</chem>    |        |        |        |
| <b>(S)-6, 8-dimethoxy-3-methylisochroman-1-one</b>                                                              | SK-024 | 222.24 | 44.77  |
| <chem>O=C1O[C@@H](C)CC2=C1C(OC)=CC(OC)=C2</chem>                                                                |        |        |        |
| <b>Lovastatin</b>                                                                                               | SK-025 | 404.55 | 72.84  |
| <chem>CC[C@H](C)C(O[C@H]1C[C@@H](C)C=C2C=C[C@H](C)[C@H](CC[C@H](C)[C@@H](O)C3)OC3=O)[C@@]12[H])=O</chem>        |        |        |        |
| <b>3-hydroxy-5-[[4-hydroxy-3-(3-methyl-2-buten-1-yl)phenyl]methyl]-4-(4-hydroxyphenyl)- 2(5H)-furanone</b>      | SK-026 | 366.41 | 86.99  |
| <chem>O=C1OC(CC2=CC=C(O)C(C/C=C(C)\C)=C2)C(C3=CC=C(O)C=C3)=C1O</chem>                                           |        |        |        |
| <b>Aspergillamide A</b>                                                                                         | SK-027 | 474.61 | 94.60  |
| <chem>CC(C)C[C@H](NC(C)=O)C(N([C@@H](CC1=CC=CC=C1)C(N/C=C\C2=CNC3=C2C=CC=C3)=O)C)=O</chem>                      |        |        |        |
| <b>Aspergillamide B</b>                                                                                         | SK-028 | 474.61 | 94.30  |
| <chem>CC(C)C[C@H](NC(C)=O)C(N([C@@H](CC1=CC=CC=C1)C(N/C=C/C2=CNC3=C2C=CC=C3)=O)C)=O</chem>                      |        |        |        |
| <b>Aspergillamide C</b>                                                                                         | SK-029 | 490.60 | 114.52 |
| <chem>CC[C@H](C)[C@H](NC(C)=O)C(N([C@@H](CC1=CC=C(O)C=C1)C(N/C=C\C2=CNC3=C2C=CC=C3)=O)C)=O</chem>               |        |        |        |
| <b>Aspergillamide D</b>                                                                                         | SK-030 | 490.60 | 114.52 |
| <chem>CC[C@H](C)[C@H](NC(C)=O)C(N([C@@H](CC1=CC=C(O)C=C1)C(N/C=C/C2=CNC3=C2C=CC=C3)=O)C)=O</chem>               |        |        |        |
| <b>Methyl, 2-(3-formyl-4-hydroxybenzyl)-4-hydroxy-3-(4-hydroxyphenyl)-5-oxo-2,5-dihydrofuran-2-carboxylate</b>  | SK-031 | 384.34 | 130.37 |
| <chem>O=C1OC(CC2=CC=C(O)C(C=O)=C2)(C(OC)=O)C(C3=CC=C(O)C=C3)=C1O</chem>                                         |        |        |        |
| <b>Methyl, 3,4,5-trimethoxy-2-(2- (nicotinamido)benzamido) benzoate</b>                                         | SK-032 | 465.46 | 125.09 |
| <chem>O=C(OC)C1=CC(OC)=C(OC)C(OC)=C1NC(C2=CC=CC=C2NC(C3=CN=CC=C3)=O)=O</chem>                                   |        |        |        |
| <b>Kigelin</b>                                                                                                  | SK-033 | 238.24 | 65.00  |
| <chem>O=C1C2=C(C=C(OC)C(OC)=C2O)C[C@@H](C)O1</chem>                                                             |        |        |        |
| <b>Questin</b>                                                                                                  | SK-034 | 284.27 | 83.83  |
| <chem>O=C1C2=C(C=C(O)C=C2OC)C(C3=CC(C)=CC(O)=C13)=O</chem>                                                      |        |        |        |
| <b>5-[(3,4-dihydro-2,2-dimethyl-2H-1-benzopyran-6-yl)- methyl]-3-hydroxy-4-(4-hydroxyphenyl)-2(5H)-furanone</b> | SK-035 | 366.41 | 76.00  |
| <chem>O=C1OC(CC2=CC=C3C(CCC(C)(C)O3)=C2)C(C4=CC=C(O)C=C4)=C1O</chem>                                            |        |        |        |
| <b>4-(4-hydroxyphenyl)-5- (4-hydroxyphenylmethyl)-2-hydroxyfuran-2-one</b>                                      | SK-036 | 284.31 | 69.92  |
| <chem>OC1OC(CC2=CC=C(O)C=C2)C(C3=CC=C(O)C=C3)=C1</chem>                                                         |        |        |        |

|                                                                                                          |        |        |        |
|----------------------------------------------------------------------------------------------------------|--------|--------|--------|
| <b>Butyrolactone I</b><br>O=C([C@](C(C1=CC=C(O)C=C1)=C2O)(CC3=CC=C(O)C(C/C=C(C)\C)=C3)OC2=O)OC           | SK-037 | 424.4  | 113.29 |
| <b>Butyrolactone II</b><br>O=C([C@](C(C1=CC=C(O)C=C1)=C2O)(CC3=CC=C(O)C=C3)OC2=O)OC                      | SK-038 | 356.33 | 113.29 |
| <b>Isobutyrolactone II</b><br>CO[C@]1(C(=C(C(=O)O1)O)C2=CC=C(C=C2)O)CC3=CC=C(C=C3)O                      | SK-039 | 328.32 | 96.22  |
| <b>4-O-Demethylisobutyrolactone II</b><br>C1=CC(=CC=C1C[C@@]2(C(=C(C(=O)O2)O)C3=CC=C(C=C3)O)O)O          | SK-040 | 314.29 | 107.22 |
| <b>Butyrolactone III</b><br>O=C([C@](C(C1=CC=C(O)C=C1)=C2O)(CC3=CC=C(O)C(CC4OC4(C)C)=C3)OC2=O)OC         | SK-041 | 440.45 | 125.82 |
| <b>Butyrolactone IV</b><br>CC(C)([C@H]1CC2=C(O1)C=CC(=C2)C[C@@]3(C(=C(C(=O)O3)O)C4=CC=C(C=C4)O)C(=O)OC)O | SK-042 | 440.45 | 122.53 |
| <b>Butyrolactone V</b><br>CC1([C@H](CC2=C(O1)C=CC(=C2)C[C@@]3(C(=C(C(=O)O3)O)C4=CC=C(C=C4)O)C(=O)OC)O)C  | SK-043 | 440.45 | 122.53 |
| <b>Butyrolactone VI</b><br>O=C([C@](C(C1=CC=C(O)C=C1)=C2O)(CC3=CC=C(O)C(C[C@H](O)C(C)(O)C)=C3)OC2=O)OC   | SK-044 | 458.46 | 153.75 |
| <b>Butyrolactone VII</b><br>CCOC(=O)[C@]1(C(=C(C(=O)O1)O)C2=CC=C(C=C2)O)CC3=CC(=C(C=C3)O)CC=C(C)C        | SK-045 | 438.48 | 113.29 |
| <b>Butyrolactone VIII</b><br>CC(=CCC1=C(C=CC(=C1)CC2=C(C(OC2=O)(C(=O)OC)O)C3=CC=C(C=C3)O)O)C             | SK-046 | 424.45 | 113.29 |
| <b>Emodin</b><br>O=C1C2=C(C=C(C)C=C2O)C(C3=CC(O)=CC(O)=C13)=O                                            | SK-047 | 270.24 | 94.83  |
| <b>Camptothecin</b><br>O=C1C2=C(C=C(O)C=C2OC)C(C3=CC(C)=CC(O)=C13)=O                                     | SK-048 | 284.27 | 83.83  |
| <b>Terremide A</b><br>O=C(OC)C1=CC=CC(O)=C1NC(C2=CC=CC=C2NC(C3=CC=CN=C3)=O)=O                            | SK-049 | 391.38 | 117.62 |
| <b>Terremide B</b><br>O=C(OC)C1=CC=CC(O)=C1N2C(C3=CC=CN=C3)=NC4=C(C=CC=C4)C2=O                           | SK-050 | 373.37 | 94.32  |
| <b>Terremide C</b><br>O=C(OC)C1=CC(OC)=C(OC)C(OC)=C1N2C(C3=CC=CN=C3)=NC4=C(C=CC=C4)C2=O                  | SK-051 | 447.45 | 101.80 |
| <b>Terrelactone A</b><br>O=C([C@](C(C1=CC=C(OC)C=C1)=C2O)(CC3=CC(C/C=C(C)\C)=C(O)C(OC)=C3)OC2=O)OC       | SK-052 | 468.50 | 111.53 |
| <b>Aspulvinone B</b><br>O=C(C(C1=CC(CCC(C)(C)O2)=C2C=C1)=C/3O)OC3=C/C4=CC=C(O)C(C/C=C(C)\C)=C4           | SK-053 | 432.52 | 79.90  |
| <b>Aspulvinone C</b><br>CC1(CCC2=CC(=C(C=C2O1)O)/C=C\3/C(=C(C(=O)O3)C4=CC5=C(C=C4)OC(CC5)(C)C)O)C        | SK-054 | 448.51 | 89.14  |
| <b>Aspulvinone E</b><br>O=C(C(C1=CC=C(O)C=C1)=C/2O)OC2=C/C3=CC=C(O)C=C3                                  | SK-055 | 296.28 | 90.89  |
| <b>Aspulvinone D</b><br>CC(=CCC1=C(C=CC(=C1)/C=C\2/C(=C(C(=O)O2)C3=C(C=C4C(=C3)CCC(O4)(C)C)O)O)O)C       | SK-056 | 448.51 | 100.13 |
| <b>Isoaspulvinone E</b><br>O=C(C(C1=CC=C(O)C=C1)=C/2O)OC2=C\C3=CC=C(O)C=C3                               | SK-057 | 296.28 | 90.89  |
| <b>Aspulvinone F</b>                                                                                     | SK-058 | 464.51 | 109.36 |

|                                                                                                                      |         |        |        |
|----------------------------------------------------------------------------------------------------------------------|---------|--------|--------|
| <chem>O=C(C(C1=CC(CCC(C)(C)O2)=C2C=C1O)=C/3O)OC3=C/C4=CC5=C(OC(C(C)(O)C)C5)C=C4</chem>                               |         |        |        |
| <b>Aspulvinone G</b>                                                                                                 | SK-059  | 312.28 | 111.12 |
| <chem>O=C(C(C1=CC=C(O)C=C1O)=C/2O)OC2=C/C3=CC=C(O)C=C3</chem>                                                        |         |        |        |
| <b>Aspulvinone H</b>                                                                                                 | SK-060  | 432.52 | 90.89  |
| <chem>O=C(C(C1=CC=C(O)C(C/C=C(C)\C)=C1)=C/2O)OC2=C/C3=CC=C(O)C(C/C=C(C)\C)=C3</chem>                                 |         |        |        |
| <b>Rubrolide S</b>                                                                                                   | SK-061  | 348.40 | 59.67  |
| <chem>O=C(C=C/1C2=CC=C(O)C=C2)OC1=C/C3=CC(CCC(C)(C)O4)=C4C=C3</chem>                                                 |         |        |        |
| <b>Rubrolide R</b>                                                                                                   | SK-062  | 348.40 | 70.67  |
| <chem>O=C(C=C/1C2=CC=C(O)C=C2)OC1=C/C3=CC=C(O)C(C/C=C(C)\C)=C3</chem>                                                |         |        |        |
| <b>Aspulvinone R</b>                                                                                                 | SK-063  | 466.53 | 131.35 |
| <chem>O=C(C(C1=CC(CCC(C)(O)C)=C(O)C=C1O)=C/2O)OC2=C/C3=CC=C(O)C(C/C=C(C)\C)=C3</chem>                                |         |        |        |
| <b>Aspulvinone V</b>                                                                                                 | SK-064  | 498.62 | 79.90  |
| <chem>O=C(C(C1=CC(C=CC(C)(C)O2)=C2C(C/C=C(C)\C)=C1)=C/3O)OC3=C/C4=CC=C(O)C(C/C=C(C)\C)=C4</chem>                     |         |        |        |
| <b>Aspulvinone W</b>                                                                                                 | SK-065  | 448.51 | 100.13 |
| <chem>O=C(C(C1=CC(C/C=C(C)/C)=C(O)C=C1)=C/2O)OC2=C/C3=CC=C(CC(C(C)(C)O)O4)C4=C3</chem>                               |         |        |        |
| <b>Aspulvinone X</b>                                                                                                 | SK-066  | 448.51 | 89.14  |
| <chem>O=C(C(C1=CC(CCC(C)(C)O2)=C2C=C1)=C/3O)OC3=C/C4=CC=C(CC(C(C)(C)O)O5)C5=C4</chem>                                |         |        |        |
| <b>Kodaistatin A</b>                                                                                                 | SK-067  | 630.65 | 202.79 |
| <chem>O=C(C(C1=CC(O)=C(O)C=C1C2=C(CC(/C=C/C(C)=C/C(C)CC)=O)C(C(O)C2(C(C)=O)O)=O)=C/3O)OC3=C/C4=CC=C(O)C=C4</chem>    |         |        |        |
| <b>Kodaistatin C</b>                                                                                                 | SK-068  | 646.64 | 223.02 |
| <chem>O=C(C(C1=CC(O)=C(O)C=C1C2=C(CC(/C=C/C(C)=C/C(C)CC)=O)C(C(O)C2(C(C)=O)O)=O)=C/3O)OC3=C/C4=CC=C(O)C(O)=C4</chem> |         |        |        |
| <b>Versicolactone G</b>                                                                                              | SK-069  | 440.49 | 102.30 |
| <chem>O=C([C@](C(C1=CC=CC=C1)=C2O)(CC3=CC=C(O)C(CCC(C)(OC)C)=C3)OC2=O)OC</chem>                                      |         |        |        |
| <b>(+)-Terrein</b>                                                                                                   | SK-070  | 154.16 | 57.53  |
| <chem>O=C1C=C/C=C/C/[C@H](O)[C@H]1O</chem>                                                                           |         |        |        |
| <b>Butyrolactone I, 2-sulfate</b>                                                                                    | SK-071  | 504.51 | 156.67 |
| <chem>O=C([C@](C(C1=CC=C(O)C=C1)=C2OS(=O)(O)=O)(CC3=CC=C(O)C(C/C=C(C)\C)=C3)OC2=O)OC</chem>                          |         |        |        |
| <b>Butyrolactone I, 4``-Sulfated</b>                                                                                 | SK-072  | 504.51 | 153.51 |
| <chem>O=C([C@](C(C1=CC=C(O)C=C1)C2=O)(CC3=CC=C(OS(=O)(O)=O)C(C/C=C(C)\C)=C3)OC2=O)OC</chem>                          |         |        |        |
| <b>7``-Hydroxybutyrolactone III</b>                                                                                  | SK- 073 | 456.44 | 146.05 |
| <chem>O=C([C@](C(C1=CC=C(O)C=C1)=C2O)(CC3=CC=C(O)C(C(O)C4OC4(C)C)=C3)OC2=O)OC</chem>                                 |         |        |        |
| <b>(+)-3',3'-di-(dimethylallyl)-butyrolactone II</b>                                                                 | SK- 074 | 492.57 | 113.29 |
| <chem>CC(=CCC1=C(C=CC(=C1)C[C@@]2(C(=C(C(=O)O2)O)C3=CC(=C(C=C3)O)CC=C(C)C)C(=O)OC)O)C</chem>                         |         |        |        |
| <b>14α-hydroxyergosta-4,7,22-triene-3,6-dione</b>                                                                    | SK-075  | 424.62 | 54.37  |
| <chem>C[C@H](C(C)C)/C=C/[C@@H](C)[C@H]1CC[C@@]2(O)C3=CC(C4=CC(CC[C@]4(C)[C@@]3([H]))CC[C@]12C)=O=O</chem>            |         |        |        |
| <b>Asterelenin</b>                                                                                                   | SK-076  | 431.49 | 89.94  |

|                                                                                                                                                                                        |        |        |        |
|----------------------------------------------------------------------------------------------------------------------------------------------------------------------------------------|--------|--------|--------|
| <chem>O=C(NC1=CC=CC=C21)[C@@]3(O)C[C@@]4(C(C=C)(C)C)C5=CC=CC=C5N(C(C)=O)[C@@]4([H])N3C2=O</chem>                                                                                       |        |        |        |
| <b>(3E,7E)-4,8-dimethylundeca-3,7-diene-1,11-diol</b><br><chem>OCC/C=C(C)/CC/C=C(C)/CCCO</chem>                                                                                        | SK-077 | 212.33 | 40.46  |
| <b>Monacolin L</b><br><chem>O=C1O[C@H](CC[C@H]2[C@@H](C)C=CC3=C[C@H](C)CC[C@]23[H])C[C@@H](O)C1</chem>                                                                                 | SK-078 | 304.43 | 46.53  |
| <b>Pulvinic acid</b><br><chem>C1=CC=C(C=C1)C2=C/C(=C/C3=CC=CC=C3)\C(=O)O/OC2=O)O</chem>                                                                                                | SK-079 | 308.28 | 87.74  |
| <b>Terrephenol A</b><br><chem>CC(=CCC1=C(C(=CC(=C1)C[C@@]2(C(=C(C(=O)O2)O)C3=CC=C(C=C3)O)C(=O)OC)OC)O)C</chem>                                                                         | SK-080 | 454.48 | 122.53 |
| <b>Terrephenol B</b><br><chem>CC(=CCC1=C(C(=CC(=C1O)C[C@@]2(C(=C(C(=O)O2)O)C3=CC=C(C=C3)O)C(=O)OC)OC)C</chem>                                                                          | SK-081 | 454.48 | 122.53 |
| <b>Terrephenol C</b><br><chem>O=C([C@](C(C1=CC=C(OC)C=C1)=C2O)(CC3=CC(C/C=C(C)/C)=C(O)C(OC)=C3)OC2=O)OC</chem>                                                                         | SK-082 | 468.50 | 111.53 |
| <b>Terrenolide S</b><br><chem>CCOC1=C([C@](OC1=O)(CC2=CC=C(C=C2)O)C(=O)OC)C3=CC=C(C=C3)O</chem>                                                                                        | SK-083 | 384.38 | 102.30 |
| <b>Xenofuranone A</b><br><chem>COC1=C(C(OC1=O)CC2=CC=CC=C2)C3=CC=CC=C3</chem>                                                                                                          | SK-084 | 280.32 | 35.54  |
| <b>Xenofuranone B</b><br><chem>C1=CC=C(C=C1)CC2C(=C(C(=O)O2)O)C3=CC=CC=C3</chem>                                                                                                       | SK-085 | 266.30 | 46.53  |
| <b>Luteoride E</b><br><chem>O=C(OC)/C(CC1=CNC2=C1C=CC=C2C/C=C(C)\C)=N/O</chem>                                                                                                         | SK-086 | 300.36 | 74.69  |
| <b>3-hydroxy-5-(4-hydroxybenzyl)-4-(4-hydroxyphenyl)furan-2(5H)-one</b><br><chem>O=C1C(O)=C(C2=CC=C(O)C=C2)C(CC3=CC=C(O)C=C3)O1</chem>                                                 | SK-087 | 298.29 | 86.99  |
| <b>5-[(3,4-Dihydro-2,2-dimethyl-2H-1-benzopyran-6-yl)-methyl]-3-hydroxy-4-(4-hydroxyphenyl)-2(5H)-furanone</b><br><chem>O=C1OC(CC2=CC=C3C(CCC(C)(C)O3)=C2)C(C4=CC=C(O)C=C4)=C1O</chem> | SK-088 | 366.41 | 76.00  |
| <b>Arisugasin A</b><br><chem>O=C1[C@]2(C)[C@@]3(O)CC4=C(C=C(C5=CC=C(OC)C(OC)=C5)OC4=O)O[C@]3(C)CC[C@@]2(O)C(C)(C)C=C1</chem>                                                           | SK-089 | 496.56 | 115.44 |
| <b>Terreulactone A</b><br><chem>C[C@@]12CC[C@]34[C@@]([C@]1(CC5=C(O2)C=C(OC5=O)C6=CC=C(C=C6)OC)O)(C(=O)[C@](C3(C)C)(C(=O)O4)OC)C</chem>                                                | SK-090 | 510.54 | 121.52 |
| <b>Terreulactone B</b><br><chem>C[C@@]12CC[C@]3([C@@]([C@]1(CC4=C(O2)C=C(OC4=O)C5=CC=C(C=C5)OC)O)(C=CC(=O)C3(C)C)C)O</chem>                                                            | SK-091 | 466.53 | 106.21 |
| <b>Terreulactone C</b><br><chem>C[C@]12CCC(=O)C([C@@]1(CC[C@@]3([C@@]2(CC4=C(O3)C=C(OC4=O)C5=CC=C(C=C5)OC)O)C)O)(C)C</chem>                                                            | SK-092 | 468.55 | 103.21 |
| <b>Terreulactone D</b><br><chem>C[C@@]12CC[C@]3([C@@]([C@]1(CC4=C(O2)C=C(OC4=O)C5=CC(=C(C(=C5)OC)OC)OC)O)(C(=O)C=C(C3(C)C)OC)C)O</chem>                                                | SK-093 | 556.61 | 133.91 |

|                                                                                                                                                                                                                  |        |         |        |
|------------------------------------------------------------------------------------------------------------------------------------------------------------------------------------------------------------------|--------|---------|--------|
| <b>Psoralenone</b><br>O=C1C(C2=CC(C[C@H](O)C(C)(C)O3)=C3C=C2)=COC4=C1C=C(OC)C(OC)=C4                                                                                                                             | SK-094 | 382.41  | 78.14  |
| <b>Aspulvinone I</b><br>CC(=CCC1=C(C=CC(=C1)/C=C\2/C(=C(C(=O)O2)C3=CC=C(C=C3)O)O)O)C                                                                                                                             | SK-095 | 364.40  | 90.89  |
| <b>Blasticidin S</b><br>CN(CC[C@@H](CC(=O)N[C@H]1C=C[C@@H](O[C@@H]1C(=O)O)N2C=CC(=NC2=O)N)N)C(=N)N                                                                                                               | SK-096 | 422.45  | 215.69 |
| <b>Terreic acid (5,6-epoxy-3-hydroxy-p-toluquinone)</b><br>CC1=C(C(=O)[C@H]2[C@@H](C1=O)O2)O                                                                                                                     | SK-097 | 154.12  | 66.90  |
| <b>Novobenzomalvin D</b><br>O=C(NCC(C1=CC=CC=C1)=O)C2=CC=CC=C2N3C(NC4=C(C=CC=C4)C3=O)=O                                                                                                                          | SK-098 | 399.41  | 101.04 |
| <b>Astalluminoxide</b><br>CC1=NC(OC)=C(CC2=CNC3=C(C/C=C(C)\C)C=CC=C23)N([O-])<br>C1=O.CC4=NC(OC)=C(CC5=CNC6=C(C/C=C(C)\C)C=CC=C56)N([O-])<br>C4=O.CC7=NC(OC)=C(CC8=CNC9=C(C/C=C(C)\C)C=CC=C89)N([O-])C7=O.[Al+3] | SK-099 | 1083.48 | 255.12 |
| <b>Astechrome</b><br>CC1=NC(OC)=C(CC2=CNC3=C(C/C=C(C)\C)C=CC=C23)N(O)C1=[OH+].<br>CC4=NC(OC)=C(CC5=CNC6=C(C/C=C(C)\C)C=CC=C56)N(O)C4=[OH+].<br>CC7=NC(OC)=C(CC8=CNC9=C(C/C=C(C)\C)C=CC=C89)N(O)C7=[OH+].[Fe]     | SK-100 | 1119.11 | 263.02 |
| <b>3-hydroxy-5-(4-hydroxybenzyl)-4-(4-hydroxyphenyl)furan-2(5H)-one</b><br>O=C1OC(CC2=CC=C(O)C=C2)C(C3=CC=C(O)C=C3)=C1O                                                                                          | SK-101 | 298.29  | 86.99  |
| <b>3-(p-hydroxyphenyl)-4-hydroxy-S-(p-hydroxybenzylidene)-2(5H)-furanone</b><br>O=C(C(C1=CC=C(O)C=C1)=C/2O)OC2=C\C3=CC=C(O)C=C3                                                                                  | SK-102 | 296.28  | 90.89  |
| <b>Versicolactone B</b><br>C/C/1=C/C/[C@@H]([C@H]2C[C@@H](CC[C@@H]1O)C(=O)O2)C(=C)C                                                                                                                              | SK-103 | 250.34  | 46.53  |
| <b>Bisdethiodi(methylthio)acetylaranotin</b><br>CC(OC(C=COC=C1C[C@@]23SC)C1N3C([C@@]4(SC)CC5=COC=CC(OC(C)=O)C5N4C2=O)=O)=O                                                                                       | SK-104 | 534.61  | 111.70 |
| <b>Terrusnolide A</b><br>CC(=CCC1=C(C=CC(=C1)CC(=O)CC2=CC=C(C=C2)O)O)C                                                                                                                                           | SK-105 | 310.39  | 57.53  |
| <b>(+)-Geodin</b><br>CC1=C(C(=C2C(=C1Cl)O[C@]3(C2=O)C(=CC(=O)C=C3OC)C(=O)OC)O)Cl                                                                                                                                 | SK-106 | 399.18  | 99.14  |
| <b>Botryosphaerin B</b><br>C[C@]12CCC[C@]([C@@H]1C=C[C@]3([C@@H]2CC(=O)O3)CO)(C)C(=O)O                                                                                                                           | SK-107 | 294.35  | 83.83  |
| <b>Botryosphaerin F</b><br>C[C@]12CCC[C@]3([C@@H]1[C@@H]([C@H]([C@H]4C2=CC(=O)OC4)O)OC3=O)C                                                                                                                      | SK-108 | 292.33  | 72.84  |
| <b>13,14,15,16-tetranorlabd-7-ene-19,6b:12,17-diolide</b><br>O=C(OCC1=C[C@@]2([H])O3)CC1[C@@]([C@@]24[H])(C)CCC[C@]4(C)C3=O                                                                                      | SK-109 | 276.33  | 52.61  |
| <b>LLZ1271b</b><br>O=C([C@@]1(C)CCC[C@]2(C)[C@@H](CC(O)=O)C(C(O)C[C@@]12[H])=C)O                                                                                                                                 | SK-110 | 296.36  | 94.83  |
| <b>Anhydrojavanicin</b><br>CC1=CC2=C(C(=C3C(=O)C=C(C(=O)C3=C2O1)OC)O)C                                                                                                                                           | SK-111 | 272.26  | 76.74  |
| <b>8-O-methylbostrycoidin</b>                                                                                                                                                                                    | SK-112 | 299.28  | 85.73  |

|                                                                                                                                                                                       |        |        |        |
|---------------------------------------------------------------------------------------------------------------------------------------------------------------------------------------|--------|--------|--------|
| <chem>CC1=CC2=C(C=N1)C(=O)C3=C(C2=O)C(=C(C=C3OC)OC)O</chem>                                                                                                                           |        |        |        |
| <b>3β,5α-dihydroxy-(22E,24R)-ergosta-7,22-dien-6-one</b><br><chem>O=C1[C@@]2(O)C[C@@H](O)CC[C@]2(C)[C@@]3(C)CC[C@]4(C)[C@@H]([C@@H](/C=C/[C@H](C)C(C)C)C)CC[C@@]4([H])C3=C1</chem>    | SK-113 | 442.68 | 57.53  |
| <b>3β,5α,14α-trihydroxy-(22E,24R)-ergosta-7,22-dien-6-one</b><br><chem>O=C1[C@@]2(O)C[C@@H](O)CC[C@]2(C)[C@@]3(C)CC[C@]4(C)[C@@H]([C@@H](/C=C/[C@H](C)C(C)C)C)CC[C@@]4(O)C3=C1</chem> | SK-114 | 458.68 | 77.75  |
| <b>NGA0187</b><br><chem>C[C@H](/C=C/[C@H](C)C(C)C)[C@H]1[C@H](C[C@@H]2[C@@]1(C[C@@H](C3C2[C@H](C(=O)[C@@H]4[C@@]3(CC[C@@H](C4)O)C)O)C)OC(=O)C</chem>                                  | SK-115 | 504.71 | 104.06 |
| <b>Beauvericin</b><br><chem>CC(C)[C@@H]1C(=O)N([C@H](C(=O)O[C@@H](C(=O)N([C@H](C(=O)O[C@@H](C(=O)N([C@H](C(=O)O1)CC2=CC=CC=C2)C)C(C)C)CC3=CC=CC=C3)C)C(C)C)CC4=CC=CC=C4)C</chem>      | SK-116 | 783.96 | 139.84 |
| <b>Terrstatin A</b><br><chem>C[C@H]1C=CC2=C[C@H](CC[C@@H]2[C@H]1CCC(=O)OC)CO</chem>                                                                                                   | SK-117 | 264.37 | 46.83  |
| <b>Terrstatin B</b><br><chem>C[C@H]1C=CC2=C[C@H](CC[C@@H]2[C@H]1CCC(=O)OC)CO</chem>                                                                                                   | SK-118 | 264.37 | 46.53  |
| <b>(+)-Asperteretone F</b><br><chem>CC(=CCC1=C(C=CC(=C1)C(=O)C2=C(C(=O)O[C@H]2OC)C3=CC=C(C=C3)O)O)C</chem>                                                                            | SK-119 | 394.42 | 93.07  |
| <b>(-)-Asperteretone F</b><br><chem>CC(=CCC1=C(C=CC(=C1)C(=O)C2=C(C(=O)O[C@@H]2OC)C3=CC=C(C=C3)O)O)C</chem>                                                                           | SK-120 | 394.42 | 93.07  |
| <b>Sulochrin</b><br><chem>CC1=CC(=C(C(=C1)O)C(=O)C2=C(C=C(C=C2OC)O)C(=O)OC)O</chem>                                                                                                   | SK-121 | 332.31 | 113.29 |
| <b>(2'R)-Westerdijkin A</b><br><chem>O=C(OC)CC1=CC=C(OC[C@H](O)C(C)=C)C=C1</chem>                                                                                                     | SK-122 | 250.29 | 55.77  |
| <b>Methyl, 4-hydroxyphenylacetate</b><br><chem>O=C(OC)CC1=CC=C(O)C=C1</chem>                                                                                                          | SK-123 | 166.18 | 46.53  |
| <b>Ampelopyrone</b><br><chem>CC1=C(C=C(OC1=O)CC(C)OC(=O)C)O</chem>                                                                                                                    | SK-124 | 226.23 | 76.74  |
| <b>Sporogen-AO 1</b><br><chem>C[C@H]1[C@@H](CCC2=CC(=O)[C@]3([C@@H]([C@]12C)O3)C(=C)C)O</chem>                                                                                        | SK-125 | 248.32 | 49.83  |
| <b>Asperdemin</b><br><chem>CC1=CC2=C(C[C@H]3[C@](O2)(C[C@H]([C@@H]4[C@@]3([C@H](CC(=O)OC4(C)C)O)C)O)C(=O)O1</chem>                                                                    | SK-126 | 392.45 | 106.21 |
| <b>(S)-(+)-11-dehydroxydonic acid</b><br><chem>CC(=C)CCC[C@@](C)(C1=C(C=C(C=C1)C(=O)O)O)O</chem>                                                                                      | SK-127 | 264.32 | 77.75  |
| <b>Asperversin E</b><br><chem>CC1=CC2=C(C[C@H]3[C@](O2)(C[C@H]([C@@H]4[C@@]3([C@H](CC(=O)OC4(C)C)O)C)OC(=O)C)C(=O)O1</chem>                                                           | SK-128 | 434.49 | 112.28 |
| <b>Asperversin G</b><br><chem>CC1=CC2=C(C[C@H]3[C@](O2)(C[C@H]([C@@H]4[C@@]3(C=CC(=O)C4(C)C)C)OC(=O)C)C(=O)O1</chem>                                                                  | SK-129 | 40.47  | 82.82  |



|                                                                                                                                                                                                   |        |        |        |
|---------------------------------------------------------------------------------------------------------------------------------------------------------------------------------------------------|--------|--------|--------|
| <b>Asperterone B</b><br>O=C(C(CC1=CC=C(O)C(CCC(C)(O)C)=C1)=C2C3=CC=C(O)C=C3)OC2=O                                                                                                                 | SK-130 | 382.41 | 107.97 |
| <b>Asperterone C</b><br>O=C(C(CC1=CC=C2C(CCC(C)(C)O2)=C1)=C3C4=CC=C(O)C=C4)OC3=O                                                                                                                  | SK-131 | 364.40 | 76.74  |
| <b>12β,15α,25,28-tetrahydroxyergosta-4,6,8(14),22-tetraen-3-one</b><br>CC(C)(O)[C@@H](CO)/C=C/[C@@H](C)[C@H]1CC(O)C2=C3C=CC4=CC(CC[C@]4(C)[C@@]3([H])CC(O)[C@]12C)=O                              | SK-132 | 456.62 | 97.98  |
| <b>Terrequinone A</b><br>CC(=CCC1=C(C(=O)C(=O)C(=C1O)C2=C(NC3=CC=CC=C32)C(C)(C)C=C)C4=CNC5=CC=CC=C54)C                                                                                            | SK-133 | 490.60 | 85.95  |
| <b>Oleic acid</b><br>CCCCCCCC/C=C\CCCCCCCC(=O)O                                                                                                                                                   | SK-134 | 282.5  | 37.30  |
| <b>Terrefuranone</b><br>O=C1[C@](C)(/C=C/C=CC)OC(CC(O)C)=C1                                                                                                                                       | SK-135 | 236.31 | 46.53  |
| <b>Terremutin hydrate</b><br>O=C1C(C)=C(O)[C@H](O)[C@@H](O)[C@@H]1O                                                                                                                               | SK-136 | 174.15 | 97.98  |
| <b>Asteric acid</b><br>O=C(O)C1=C(OC2=C(C(OC)=O)C=C(O)C=C2OC)C=C(C)C=C1O                                                                                                                          | SK-137 | 348.31 | 122.53 |
| <b>Dihydroerdin</b><br>O=C(O)C1=CC(O)=CC(OC)=C1C(C2=C(O)C(Cl)=C(C)C(Cl)=C2O)=O                                                                                                                    | SK-138 | 387.17 | 124.29 |
| <b>Sulochrin</b><br>O=C(OC)C1=CC(O)=CC(OC)=C1C(C2=C(O)C=C(C)C=C2O)=O                                                                                                                              | SK-139 | 332.31 | 113.29 |
| <b>Taxol</b><br>O=C(O[C@@H]([C@]1([H])[C@]2(OC(C)=O)CO[C@]2([H])C[C@H](O)[C@@]31C)[C@](C4(C)C)(O)C[C@H](OC([C@H](O)[C@@H](NC(C5=CC=CC=C5)=O)C6=CC=CC=C6)=O)C(C)=C4[C@@H](OC(C)=O)C3=O)C7=CC=CC=C7 | SK-143 | 853.92 | 221.31 |
| <b>3,6-dihydroxytoluquinone</b><br>O=C1C(C)=C(O)C(C=C1O)=O                                                                                                                                        | SK-144 | 154.12 | 74.60  |
| <b>Terreusinone</b><br>O=C(C1=C2C=C([C@H](O)C(C)C)N1)C3=C(NC([C@H](O)C(C)C)=C3)C2=O                                                                                                               | SK-145 | 330.38 | 106.18 |
| <b>Citreoviridin</b><br>O=C1C=C(OC)C(C)=C(/C=C/C=C/C=C/C(C)=C/[C@]2(C)O[C@H](C)[C@](C)(O)[C@H]2O)O1                                                                                               | SK-146 | 402.49 | 89.14  |
| <b>Asperlide A</b><br>CC1C(CC2=C(O1)C=CC(=C2)C[C@@]3(C(=C(C(=O)O3)O)C4=CC=CC=C4)C(=O)OC)OC                                                                                                        | SK-147 | 424.45 | 102.30 |
| <b>Asperlide B</b><br>O=C([C@](C(C1=CC=CC=C1)=C2O)(CC3=CC4=C(OC(C(C)(O)C)C4)C=C3)OC2=O)OC                                                                                                         | SK-148 | 424.45 | 102.30 |
| <b>Asperlide C</b><br>O=C1C(O)=C(C2=CC=C(O)C=C2)[C@@H](CC3=CC4=C(OC(C(C)(O)C)C4)C=C3)O1                                                                                                           | SK-149 | 382.41 | 96.22  |
| <b>Asperterpene D</b><br>O=C([C@](OC([C@]1([H])[C@@]2(C)C(C(O)=C3C4(C)C)=O)=O)(C)C([C@]1(C)C([C@]5([H])O[C@]25[C@]3(C)CCC4=O)=C)=O)OC                                                             | SK-150 | 486.52 | 136.58 |
| <b>Asperterpen E</b><br>O=C([C@@](C([C@]1(C)C(C[C@]2([H])[C@@]([C@H](O)C([C@@]3([H])C(C)(C)C(CC[C@]32C)=O)=O)(C)[C@]14[H])=C)=O)(C)OC4=O)OC                                                       | SK-151 | 474.55 | 124.05 |

|                                                                                                                                                  |            |        |        |
|--------------------------------------------------------------------------------------------------------------------------------------------------|------------|--------|--------|
| <b>Asperterpene F</b><br>C[C@H]1C([C@@]2(C)[C@@H]([C@]3(C)[C@H]([C@]4(C)CCC(C(C)(C)[C@@H]4C([C@H]3O)=O)=O)CC2=C)C(O1)=O)=O                       | SK–<br>152 | 416.51 | 97.75  |
| <b>Asperterpene G</b><br>O=C([C@@](C([C@]1(C)C(C[C@]2([H])[C@@]([C@H](O)C([C@]3([H])C(C)(C)C(CC[C@]32C)=O)=O)(C)[C@@]14[H])=C)=O)(C)OC4=O)OC     | SK–<br>153 | 474.55 | 124.05 |
| <b>Asperterpene H</b><br>O=C([C@@](C([C@]1(C)C(C[C@]2([H])[C@@]([C@H](O)C([C@]3([H])C(C)(C)C(CC[C@]32C)=O)=O)(C)[C@]14[H])=C)=O)(C)OC4=O)OCC     | SK–<br>154 | 488.58 | 124.05 |
| <b>Asperterpene I</b><br>O=C([C@H]1[C@](C)(C([C@](C)(O)C(OC)=O)=O)C(C[C@@]2([H])[C@]3(C)CC[C@@H](O)C(C)(C)[C@@]3([H])C([C@@H](O)[C@]12C)=O)=C)OC | SK–<br>155 | 508.61 | 147.44 |
| <b>Asperterpene J</b><br>O=C([C@H]1[C@](C)(C([C@](C)(O)C(OC)=O)=O)C(C[C@@]2([H])[C@]3(C)CCC(C(C)(C)[C@]3([H])C([C@@H](O)[C@]12C)=O)=O)=C)OC      | SK–<br>156 | 506.59 | 144.28 |
| <b>Asperterpene K</b><br>O=C([C@H]1[C@](C)(C([C@](C)(O)C(OC)=O)=O)C(C[C@@]2([H])[C@]3(C)CCC(C(C)(C)[C@@]3([H])C(C[C@]12C)=O)=O)=C)OC             | SK–<br>157 | 490.59 | 124.05 |
| <b>Asperterpene L</b><br>O=C([C@H]1[C@](C)(C([C@](C)(O)C(OC)=O)=O)C(C[C@@]2([H])[C@]3(C)CCC(C(C)(C)C3=C(O)C([C@]12C)=O)=O)=C)OC                  | SK–<br>158 | 504.58 | 144.28 |
| <b>Asperterpene M</b><br>C[C@H]1C([C@@]2(C(OC)=O)[C@@]3(C)CC([C@H]4[C@](CCC(C4(C)C)=O)(C)[C@@H]3CC([C@@]2(C)C(O1)=O)=C)=O)=O                     | SK–<br>159 | 458.55 | 103.82 |
| <b>Terretonin A</b><br>O=C([C@](C([C@@]1(C)C(C[C@@]2([H])[C@](C(C(O)=C3C(C)(C)C(CC[C@@]32C)=O)=O)(C)[C@@]14[H])=C)=O)(C)OC4=O)OC                 | SK–<br>160 | 472.53 | 124.05 |
| <b>Terretonin B</b><br>O=C([C@](C([C@@]1(C)C(C[C@@]2(O)[C@](C(C(O)=C3C(C)(C)C(CC[C@@]32C)=O)=O)(C)[C@@]14[H])=C)=O)(C)OC4=O)OC                   | SK–<br>161 | 488.53 | 144.28 |
| <b>Terretonin D</b><br>O=C([C@](C([C@@]1(C)C(C[C@@]2([H])[C@]([C@@H](O)C([C@@]3([H])C(C)(C)C(CC[C@@]32C)=O)=O)(C)[C@@]14[H])=C)=O)(C)OC4=O)OC    | SK–<br>162 | 474.55 | 124.05 |
| <b>Terretonin G</b><br>O=C([C@H]1[C@](C)(C([C@](C)(O)C(OC)=O)=O)C(C[C@@]2([H])[C@]3(C)CCC(C(C)(C)[C@@]3([H])C([C@@H](O)[C@]12C)=O)=O)=C)OC       | SK–<br>163 | 506.59 | 144.28 |
| <b>Emestrins B</b><br>O=C([C@@](SC)(CC1=CC=CC=C1)N2)N[C@](SC)(CC3=CC=CC=C3)C2=O                                                                  | SK–<br>164 | 386.54 | 58.20  |
| <b>Emestrins C</b><br>O=C([C@](SC)(CC1=CC=CC=C1)N2)N[C@@](SC)(CC3=CC=CC=C3)C2=O                                                                  | SK–<br>165 | 386.54 | 58.20  |
| <b>Emestrins L</b><br>CC(O[C@H]([C@@]1([H])N2C([C@](SC)(CC3=CC=CC=C3O)N4)=O)C=COC=C1C[C@@]2(SC)C4=O)=O                                           | SK–<br>166 | 476.58 | 105.17 |

|                                                                                                                                                          |            |        |        |
|----------------------------------------------------------------------------------------------------------------------------------------------------------|------------|--------|--------|
| <b>Emestrins M</b><br>O=C([C@](SC)(CC1=CC=CC=C1O)N2)N3[C@]4([H])[C@@H](O)C=COC=C4C[C@@]3(SC)C2=O                                                         | SK–<br>167 | 434.54 | 99.10  |
| <b>Pseurotin A3</b><br>O=C1C(C)=C([C@@H](O)[C@@H](O)/C=C\CC)O[C@]12C(N[C@](OC)(C(C3=CC=CC=C3)=O)[C@@H]2O)=O                                              | SK–<br>168 | 431.44 | 142.39 |
| <b>4-hydroxy-3-(3-methylbut-2-enyl)benzaldehyde</b><br>O=CC1=CC=C(O)C(C/C=C(C)\C)=C1                                                                     | SK–<br>169 | 190.24 | 37.30  |
| <b>5-N-acetylardeemin</b><br>O=C(N1[C@@H]2C)C3=CC=CC=C3N=C1[C@]4([H])C[C@@]5(C(C=C)(C)C)C6=CC=CC=C6N(C(C)=O)[C@@]5([H])N4C2=O                            | SK–<br>170 | 468.56 | 75.52  |
| <b>Gillusdin</b><br>O=C(C(C12OC3=C(C(C)=C(Cl)C(O)=C3Cl)C1=O)=CC(C(O)=C2OC)=O)OC                                                                          | SK–<br>171 | 415.18 | 119.37 |
| <b>Terrelumamide A</b><br>O=C(OC)C1=CC=CC=C1NC([C@@H](NC(C2=CN=C3N(C)C(NC(C3=N2)=O)=O)=O)[C@H](O)C)=O                                                    | SK–<br>172 | 456.42 | 185.38 |
| <b>Terrelumamide B</b><br>O=C(OC)C1=CC=CC=C1NC([C@@H](NC(C2=CN=C3N(C)C(NC(C3=N2)=O)=O)=O)CO)=O                                                           | SK–<br>173 | 442.39 | 185.38 |
| <b>Terreinol</b><br>O=C1C2(OCCC2)OCC3=C1C=C(O)C(C)=C3O                                                                                                   | SK–<br>174 | 250.25 | 76.00  |
| <b>Asterriquinone</b><br>O=C1C(O)=C(C2=CN(C(C=C)(C)C)C3=C2C=CC=C3)C(C(O)=C1C4=CN(C(C=C)(C)C)C5=C4C=CC=C5)=O                                              | SK–<br>175 | 506.60 | 84.47  |
| <b>Isoasterriquinone</b><br>O=C1C(O)=C(C2=CN(C3=C2C=CC(C/C=C(C)\C)=C3)C(C(O)=C1C4=CNC5=C4C=CC(C/C=C(C)\C)=C5)=O                                          | SK–<br>176 | 506.60 | 106.18 |
| <b>Terremutin</b><br>O=C1[C@@]2([H])O[C@@]2([H])[C@H](O)C(O)=C1C                                                                                         | SK–<br>177 | 156.14 | 70.06  |
| <b>Citrinin</b><br>O=C(C1=C(O)C(C)=C2[C@H](C)[C@@H](C)OC=C2C1=O)O                                                                                        | SK–<br>178 | 250.25 | 83.83  |
| <b>10-phenyl-[12]-cytochalasins Z16</b><br>O=C(C/C=C(C)\C([C@@H](C)C/C=C/[C@@]1([H])[C@H](O)C([C@@H](C)[C@@]2([H])[C@H](CC3=CC=CC=C3)N4)=C=O)O[C@]12C4=O | SK–<br>179 | 463.57 | 92.70  |
| <b>Rosellichalasin</b><br>O=C(C/C=C(C)\C(C(C)C/C=C/C1C2OC2(C)C(C)C3C(CC4=CC=CC=C4)N5)=O)OC13C5=O                                                         | SK–<br>180 | 463.57 | 85.00  |
| <b>Cytochalasin E</b><br>O=C(O/C=C/[C@@](C)(O)C([C@@H](C)C/C=C/[C@@]1([H])[C@]2([H])O[C@]2(C)[C@@H](C)[C@@]3([H])[C@H](CC4=CC=CC=C4)N5)=O)O[C@]13C5=O    | SK–<br>181 | 495.57 | 114.46 |
| <b>Cytochalasin Z11</b><br>O=C1N[C@@H](CC2=CC=CC=C2)[C@]3([H])[C@H](C)C([C@@H](O)[C@H]/C=C/C[C@H](C)C([C@@H](O)C)=O)[C@]13O)=C                           | SK–<br>182 | 427.54 | 106.85 |
| <b>Cytochalasin Z13</b><br>O=C1N[C@@H](CC2=CC=CC=C2)[C@]3([H])C(C)=C(C)[C@@H](O)[C@H]/C=C/C[C@H](C)C([C@@H](O)C)=O)[C@]13O                               | SK–<br>183 | 427.54 | 106.85 |

|                                                                                                                                       |            |        |        |
|---------------------------------------------------------------------------------------------------------------------------------------|------------|--------|--------|
| <b>(+)-isoterrein</b><br>O=C1C=C(/C=C/C)[C@H](O)[C@@H]1O                                                                              | SK–<br>184 | 154.16 | 57.53  |
| <b>4-hydroxy-3-(3-methyl-2-buten-1-yl)-benzaldehyde</b><br>O=CC1=CC=C(O)C(C/C=C(C)\C)=C1                                              | SK–<br>185 | 190.24 | 37.30  |
| <b>Gliotoxin</b><br>O=C1N2[C@]3([H])[C@@H](O)C=CC=C3C[C@@]42SS[C@@]1(CO)N(C)C4=O                                                      | SK–<br>186 | 326.40 | 81.07  |
| <b>Acetylaranotin</b><br>CC(OC(C=COC=C1CC23SS4)C1N3C(C54CC6=COC=CC(OC(C)=O)C6N5C2=O)=O)=O                                             | SK–<br>187 | 504.54 | 111.70 |
| <b>Terreustoxin C</b><br>C[C@H]1C([C@@]2(C)[C@@H]([C@]3(C)[C@H]([C@]4(C)CCC(C(C)(C)[C@H]4[C@@H](O)[C@H]3O)=O)CC2=C)C(O1)=O)=O         | SK–<br>188 | 418.53 | 100.90 |
| <b>Terretonin N</b><br>C[C@H]1C([C@@]2(C)[C@@H]([C@@]3(C)C[C@H](O)[C@H]4[C@](CC[C@H](OC(C)=O)C4(C)C)(C)[C@@H]3[C@H](O)C2=C)C(O1)=O)=O | SK–<br>189 | 462.58 | 110.14 |
| <b>Astepyrazinoxide</b><br>O=C1C(C)=NC(OC)=C(CC2=CNC3=C2C=CC=C3C/C=C(C)\C)N1O                                                         | SK–<br>190 | 353.42 | 80.15  |
| <b>Astepyrazinol A</b><br>O=C1C(C)=NC(OC)=C(CC2=CNC3=C2C=CC=C3C/C=C(C)\C)N1                                                           | SK–<br>191 | 337.42 | 70.78  |
| <b>Aspulvinone S</b><br>O=C(C(C1=CC(C/C=C(C)\C)=C(O)C=C1O)=C/2O)OC2=C/C3=CC(CCC(C)(C)O4)=C4C=C3                                       | SK–<br>192 | 448.51 | 100.13 |
| <b>Astepyrazinol B</b><br>O=C1NC2=C(C=CC=C2C/C=C(C)\C)[C@@H]1CC(N3)=C(OC)N=C(C)C3=O                                                   | SK–<br>195 | 353.42 | 84.09  |
| <b>Asperteretal D</b><br>O=C1C(CC2=CC=C(O)C(C/C=C(C)\C)=C2)=C(C3=CC=C(O)C=C3)C(OC)O1                                                  | SK–<br>196 | 380.44 | 76.00  |
| <b>Asperteretal E</b><br>O=C1C(CC2=CC(CCC(C)(C)O3)=C3C=C2)=C(C4=CC=C(O)C=C4)C(O)O1                                                    | SK–<br>197 | 366.41 | 76.00  |
| <b>Asperteretal F</b><br>O=C1C(CC2=CC=C(O)C(C/C=C(C)/C)=C2)=C(C3=CC=C(O)C=C3)C(O)O1                                                   | SK–<br>198 | 366.41 | 86.99  |
| <b>Asperteretal G1</b><br>O=C(O)[C@H](CC1=CC=C(O)C(C/C=C(C)\C)=C1)[C@@H](C2=CC=C(O)C=C2)C(OC)=O                                       | SK–<br>199 | 398.45 | 104.06 |
| <b>Asperteretal G2</b><br>O=C(O)[C@@H](CC1=CC=C(O)C(C/C=C(C)\C)=C1)[C@@H](C2=CC=C(O)C=C2)C(OC)=O                                      | SK–<br>200 | 398.45 | 104.06 |
| <b>Asperteretal H</b><br>O=C(OC)[C@H](O)[C@H](C1=CC=C(O)C=C1)C(CC2=CC=C(O)C(C/C=C(C)\C)=C2)=O                                         | SK–<br>201 | 398.45 | 104.06 |
| <b>Asperteretal I</b><br>O=C1C(CC2=CC(CC(O)C(C)(C)O3)=C3C=C2)=C(C4=CC=C(O)C=C4)C(O)O1                                                 | SK–<br>202 | 382.41 | 96.22  |
| <b>Asperteretone A</b><br>O=C(O)[C@H](C1=CC=C(O)C=C1)[C@H](CC2=CC=C(C/C=C(C)\C)C(O)=C2)C(OC)=O                                        | SK–<br>203 | 398.45 | 104.06 |
| <b>Asperteretone B</b><br>O=C1C(C2=CC=C(O)C=C2)=C(CCC3=CC=C(O)C(C/C=C(C)\C)=C3)[C@@H](OC)O1                                           | SK–<br>204 | 380.44 | 76.00  |
| <b>Asperteretone C</b><br>O=C1C(C2=CC=C(OC)C=C2)=C(CCC3=CC4=C(OC(C(C)(O)C)C4)C=C3)[C@@H](OC)O1                                        | SK–<br>205 | 410.47 | 74.23  |

|                                                                                                                                                                                                                        |            |        |        |
|------------------------------------------------------------------------------------------------------------------------------------------------------------------------------------------------------------------------|------------|--------|--------|
| <b>Asperteretone D</b><br>O=C1C(C2=CC=C(O)C=C2)=C(CC3=CC(CCC(C)(C)O4)=C4C=C3)[C@@H](OC)O1                                                                                                                              | SK–<br>206 | 380.44 | 65.00  |
| <b>Asperteretone E</b><br>O=C1C(C2=CC=C(O)C=C2)=C(CC3=CC=C(O)C(C/C=C(C)\C)=C3)C(OC)O1                                                                                                                                  | SK–<br>207 | 380.44 | 76.00  |
| <b>Amauromine B</b><br>CC(O[C@]1(C[C@@]23[H])C4=CC=CC=C4N[C@@]1([H])N3C([C@]5([H])C[C@@]6(C(C=C)(C)C)C7=CC=CC=C7N[C@@]6([H])N5C2=O)=O)=O                                                                               | SK–<br>208 | 498.58 | 90.98  |
| <b>Austalide N</b><br>CC(O[C@@H]1C2=C(C(C)=C3COC(C3=C2OC)=O)O[C@@]4(C)C[C@@H](O)[C@@]5(O6)C(C)(C)O[C@@]6(OC)CC[C@]5(C)[C@@]14[H])=O                                                                                    | SK–<br>209 | 532.59 | 119.01 |
| <b>(R,E)-3-(2,2-dimethylchroman-6-yl)-4-hydroxy-5-((2-(2-hydroxypropan-2-yl)-2,3-dihydrobenzofuran-5-yl)methylene)furan-2(5H)-one</b><br>O=C(C(C1=CC(CCC(C)(C)O2)=C2C=C1)=C/3O)OC3=C\C4=CC=C(O[C@@H](C(C)(O)C)C5)C5=C4 | SK–<br>210 | 448.51 | 89.14  |
| <b>Soyasapogenol B</b><br>O[C@H]1CC[C@]2(C)[C@@]3([H])CC=C4[C@]5([H])CC(C)(C)C[C@@H](O)[C@]5(C)CC[C@@]4(C)[C@]3(C)CC[C@@]2([H])[C@]1(CO)C                                                                              | SK–<br>211 | 458.73 | 60.68  |
| <b>Decanoic acid</b><br>CCCCCCCCCCC(O)=O                                                                                                                                                                               | SK–<br>212 | 172.27 | 37.30  |
| <b>Dodecanoic acid</b><br>CCCCCCCCCCCCC(O)=O                                                                                                                                                                           | SK–<br>213 | 200.32 | 37.30  |
| <b>(9Z,12Z)-N-(2-hydroxyethyl) octadeca-9,12- dienamide</b><br>CCCCC/C=C\C/C=C\CCCCCCCC(NCCO)=O                                                                                                                        | SK–<br>214 | 323.52 | 49.33  |
| <b>4β-hydroxy-6,7-dimethoxyisoflavone</b><br>O=C1C(C2=CC=C(O)C=C2)=COC3=C1C=C(OC)C(OC)=C3                                                                                                                              | SK–<br>215 | 298.29 | 68.91  |
| <b>Isoterreulactone A</b><br>O=C1CC[C@]2(C)[C@@]3(O)CC4=C(C=C(C5=CC=C(OC)C=C5)OC4=O)O[C@]3(C)CC[C@@]2(O)C(C)(C)O1                                                                                                      | SK–<br>216 | 484.55 | 115.44 |
| <b>12a-dehydroxyisoterreulactone A</b><br>C[C@]12CCC(=O)OC([C@@]1(CC[C@@]3([C@@H]2CC4=C(O3)C=C(OC4=O)C5=CC=C(OC)C)O)(C)C                                                                                               | SK–<br>217 | 468.55 | 95.21  |
| <b>Blumenol A</b><br>O=C1C=C(C)[C@@]/C=C/[C@H](O)C(O)C(C)(C)C1                                                                                                                                                         | SK–<br>218 | 224.30 | 57.53  |
| <b>Genistein</b><br>O=C1C(C2=CC=C(O)C=C2)=COC3=C1C(O)=CC(O)=C3                                                                                                                                                         | SK–<br>219 | 270.24 | 90.89  |
| <b>Biochanin A</b><br>O=C1C(C2=CC=C(OC)C=C2)=COC3=C1C(O)=CC(O)=C3                                                                                                                                                      | SK–<br>220 | 284.27 | 79.90  |
| <b>Psoralenol</b><br>O=C1C(C2=CC(CC(O)C(C)(C)O3)=C3C=C2)=COC4=C1C=CC(O)=C4                                                                                                                                             | SK–<br>221 | 338.36 | 79.90  |
| <b>Daidzein</b><br>O=C1C(C2=CC=C(O)C=C2)=COC3=C1C=CC(O)=C3                                                                                                                                                             | SK–<br>222 | 254.24 | 70.67  |
| <b>Fumitremorgin C</b><br>O=C([C@]1([H])CCCN21)N3[C@@H]/C=C(C)\C)C4=C(C5=C(N4)C=C(OC)C=C5)C[C@@]3([H])C2=O                                                                                                             | SK–<br>223 | 379.46 | 65.64  |

|                                                                                                                                                    |            |        |        |
|----------------------------------------------------------------------------------------------------------------------------------------------------|------------|--------|--------|
| <b>Bisdethiobis(methylthio)gliotoxin</b><br>O=C1N(C)[C@@](SC)(CO)C(N2[C@@]1(SC)CC3=CC=C[C@H](O)[C@@]23[H])=O                                       | SK–<br>224 | 356.47 | 81.07  |
| <b>Cyclo-(L-Pro-L-Met)</b><br>O=C(N[C@@H]1CCSC)[C@](CCC2)([H])N2C1=O                                                                               | SK–<br>225 | 228.32 | 49.41  |
| <b>Cyclo-(L-Pro-L-Tyr)</b><br>O=C(N[C@H]1CC2=CC=C(O)C=C2)[C@@](CCC3)([H])N3C1=O                                                                    | SK–<br>226 | 260.26 | 69.64  |
| <b>Cyclo-(L-Pro-L-Phe)</b><br>O=C([C@H](CCC1)N1C2=O)N[C@H]2CC3=CC=CC=C3                                                                            | SK–<br>227 | 244.29 | 49.41  |
| <b>Penicitrinone A</b><br>O=C1C=C2OC3=C4O[C@H](C)[C@@H](C)C4=C(C)C(O)=C3C5=C2C([C@H](C)[C@@H](C)O5)=C1C                                            | SK–<br>228 | 380.44 | 68.91  |
| <b>Penicitrinone B</b><br>O=C1C=C2OC3=C4OC(C)=C(C)C4=C(C)C(O)=C3C5=C2C([C@H](C)[C@@H](C)O5)=C1C                                                    | SK–<br>229 | 378.42 | 72.81  |
| <b>2,3,4-trimethyl-5,7-dihydroxy2,3-dihydrobenzofuran</b><br>OC1=C(OC(C)C2C)C2=C(C)C(O)=C1                                                         | SK–<br>230 | 194.23 | 49.69  |
| <b>Physcion</b><br>O=C1C2=C(C=C(C)C=C2O)C(C3=CC(OC)=CC(O)=C13)=O                                                                                   | SK–<br>231 | 284.27 | 83.83  |
| <b>Aspergiketal</b><br>O=C([C@]12OCCC1)C3=C(CO2)C(O)=C(C)C(O)=C3                                                                                   | SK–<br>232 | 250.25 | 76.00  |
| <b>Sinulolide I</b><br>O=C(OCC)CCCCCCCC[C@@](C(C)=C1C)(O)OC1=O                                                                                     | SK–<br>233 | 312.41 | 72.84  |
| <b>Territrem A</b><br>O=C1C2(C)C3(O)CC4=C(C=C(C5=CC(OC)=C(OCO6)C6=C5)OC4=O)OC3(C)CCC2(O)C(C)(C)C=C1                                                | SK–<br>234 | 510.54 | 124.67 |
| <b>Territrem B</b><br>O=C1[C@]2(C)[C@@]3(O)CC4=C(C=C(C5=CC(OC)=C(OC)C(OC)=C5)OC4=O)O[C@]3(C)CC[C@@]2(O)C(C)(C)C=C1                                 | SK–<br>235 | 526.58 | 124.67 |
| <b>Territrem C</b><br>O=C1[C@]2(C)[C@@]3(O)CC4=C(C=C(C5=CC(OC)=C(O)C(OC)=C5)OC4=O)O[C@]3(C)CC[C@@]2(O)C(C)(C)C=C1                                  | SK–<br>236 | 512.55 | 135.67 |
| <b>Territrem D</b><br>C[C@@]12CC[C@@]3([C@@]([C@]1(CC4=C(O2)C=C(OC4=O)C5=CC(=C(C(=C5)OC)OC)O)O)(C(=O)C=CC3(C)C)C)O                                 | SK–<br>237 | 512.55 | 135.67 |
| <b>Cowabenzophenone A</b><br>O=C(C1(C/C=C(C)/CC/C=C(C)\C)C2)[C@@]3(C(C4=CC=CC=C4)=O)C(C)(C)[C@]2([H])C[C@]5([H])C(C)(C)[C@@H](C(C)=C)CC(C3=O)5C1=O | SK–<br>238 | 598.80 | 68.25  |
| <b>Asperteramide</b><br>O=C(C(CCC1=CC=C(O)C(C/C=C(C)\C)=C1)=C2C3=CC=C(O)C=C3)NC2=O                                                                 | SK–<br>239 | 363.41 | 90.39  |
| <b>Terreinlactone B</b><br>O=C1OCCC(/C=C/C)=C1                                                                                                     | SK–<br>240 | 138.17 | 26.30  |
| <b>15bβ-hydroxyl-5-N-acetylardeemin</b><br>O=C1N2C([C@](C[C@]3(C(CC=C)(C)C)C4N(C(C)=O)C5=C3C=CC=C5)(O)N4C([C@H]2C)=O)=NC6=C1C=CC=C6                | SK–<br>241 | 498.58 | 95.74  |
| <b>10-phenyl-[12]-cytochalasin Z17</b>                                                                                                             | SK–<br>242 | 463.57 | 92.70  |

|                                                                                                                                                               |     |        |        |
|---------------------------------------------------------------------------------------------------------------------------------------------------------------|-----|--------|--------|
| <chem>O=C(C/C=C(C)\ C([C@@H](C)C/C=C/[C@H]1[C@H](O)C(C)=C(C)[C@H]2[C@H](CC3=CC=CC=C3)N4)=O)O[C@]12C4=O</chem>                                                 |     |        |        |
| <b>Neoasterriquinone.</b>                                                                                                                                     | SK– | 506.60 | 106.18 |
| <chem>O=C1C(O)=C(C2=C(C/C=C(C)\ C)NC3=C2C=CC=C3)C(C(O)=C1C4=C(C/C=C(C)\ C)NC5=C4C=CC=C5)=O</chem>                                                             | 243 |        |        |
| <b>(3R)-6,7,8-trihydroxymellein</b>                                                                                                                           | SK– | 210.19 | 86.99  |
| <chem>C[C@H]1OC(C2=C(C=C(O)C(O)=C2O)C1)=O</chem>                                                                                                              | 244 |        |        |
| <b>(3R)-8-methoxy-6-hydroxymellein</b>                                                                                                                        | SK– | 208.21 | 55.77  |
| <chem>C[C@H]1OC(C2=C(C=C(O)C=C2OC)C1)=O</chem>                                                                                                                | 245 |        |        |
| <b>4-chloro-3,6-dihydroxytoluquinone</b>                                                                                                                      | SK– | 188.57 | 74.60  |
| <chem>O=C1C(O)=C(Cl)C(C(C)=C1O)=O</chem>                                                                                                                      | 246 |        |        |
| <b>6-hydroxytoluquinol hydrate</b>                                                                                                                            | SK– | 158.15 | 77.75  |
| <chem>OC1=C(C)C([C@@H](O)C[C@@H]1O)=O</chem>                                                                                                                  | 247 |        |        |
| <b>Bisdethiobis(methylsulfanyl)acetylaranotin</b>                                                                                                             | SK– | 534.61 | 111.70 |
| <chem>CC(O[C@@H](C=COC=C1C[C@@]23SC)[C@@]1([H])N3C([C@]4(SC)CC5=COC=C[C@H](OC(C)=O)[C@@]5([H])N4C2=O)=O)=O</chem>                                             | 248 |        |        |
| <b>Bisdethiobis(methylsulfanyl)acetylapoaranotin</b>                                                                                                          | SK– | 504.63 | 85.39  |
| <chem>O=C1N2[C@](CC3=COC=C[C@H](OC(C)=O)[C@]32[H])(SC)CN4[C@@]1(SC)CC5=CC=C[C@H](OC(C)=O)[C@@]45[H]</chem>                                                    | 249 |        |        |
| <b>Bisdethiobis(methylsulfanyl)apoaranotin</b>                                                                                                                | SK– | 462.59 | 79.31  |
| <chem>O=C1N2[C@](CC3=COC=C[C@H](OC(C)=O)[C@]32[H])(SC)CN4[C@@]1(SC)CC5=CC=C[C@H](O)[C@@]45[H]</chem>                                                          | 250 |        |        |
| <b>Asperbutenolide A</b>                                                                                                                                      | SK– | 864.90 | 235.82 |
| <chem>CC(=CCC1=C(C=CC(=C1)C[C@@]2(C(=C(C(=O)O2)OC(C)(C)[C@H](CC3=C(C=CC(=C3)C[C@@]4(C(=C(C(=O)O4)O)C5=CC=C(C=C5)O)C(=O)OC)O)C6=CC=C(C=C6)O)C(=O)OC)O)C</chem> | 251 |        |        |
| <b>Asperbutenolide B</b>                                                                                                                                      | SK– | 470.47 | 131.76 |
| <chem>O=C([C@](C(C1=CC=C(O)C=C1)=C2O)(CC3=CC=C(O[C@H](C(C)(O)C)[C@H]4OC)C4=C3) OC2=O)OC</chem>                                                                | 252 |        |        |
| <b>Asperbutenolide C</b>                                                                                                                                      | SK– | 470.47 | 131.76 |
| <chem>O=C([C@](C(C1=CC=C(O)C=C1)=C2O)(CC3=CC=C(O[C@@H](C(C)(O)C)[C@@H]4OC)C4=C3)OC2=O)OC</chem>                                                               | 253 |        |        |
| <b>Asperbutenolide D</b>                                                                                                                                      | SK– | 384.43 | 104.06 |
| <chem>O=C(OC)C(CC1=CC=C(O)C(C/C=C(C)\ C)=C1)(O)C(C2=CC=C(O)C=C2)=O</chem>                                                                                     | 254 |        |        |
| <b>Asperbutenolide E</b>                                                                                                                                      | SK– | 454.48 | 125.82 |
| <chem>O=C([C@](C(C1=CC=C(O)C=C1)=C2O)(CC3=CC=C(O)C(CC4OC4(C)C)=C3)OC2=O)OCC</chem>                                                                            | 255 |        |        |
| <b>Asperbutenolide F</b>                                                                                                                                      | SK– | 354.36 | 93.07  |
| <chem>O=C(C(C(C1=CC=C(O)C=C1)=C2O)(CC3=CC=CC=C3)OC2=O)OCC</chem>                                                                                              | 256 |        |        |
| <b>(S)-Methyl-4-hydroxy-2-[4- hydroxy-3-(3-methyl-but-2-enyl)- benzyl]-3-(4-hydroxy-phenyl)-5- oxo-2,5-dihydro-furan-2- carboxylic acid methyl ester</b>      | SK– | 424.45 | 113.29 |
| <chem>O=C(O[C@]1(CC2=CC(C/C=C(C)/C)=C(O)C=C2)C(OC)=O)C(O)=C1C3=CC=C(O)C=C3</chem>                                                                             | 257 |        |        |
| <b>(Z/E)-L-phenylalaninamide</b>                                                                                                                              | SK– | 460.58 | 94.30  |
| <chem>O=C(C(N(C(C(NC(C)=O)C(C)C)=O)C)CC1=CC=CC=C1)N/C=C/C2=CNC3=CC=CC=C32</chem>                                                                              | 258 |        |        |
| <b>Furanaspermeroterpene A</b>                                                                                                                                | SK– | 558.58 | 159.59 |
|                                                                                                                                                               | 259 |        |        |

|                                                                                                                                  |     |        |        |  |
|----------------------------------------------------------------------------------------------------------------------------------|-----|--------|--------|--|
| <chem>O=C(OC)C[C@@]1([C@](OC2=O)(C(C)=O)O[C@@]3(O)C(C4C5(C)C)=O)[C@@]2(C)C([C@@H](OC(C)=O)C([C@@]13C)[C@]4(C)C=CC5=O)=C</chem>   |     |        |        |  |
| <b>Furanaspermeroterpene B</b>                                                                                                   | SK– | 560.60 | 159.59 |  |
| <chem>O=C(OC)C[C@@]1([C@](OC2=O)(C(C)=O)O[C@@]3(O)C(C4C5(C)C)=O)[C@@]2(C)C([C@@H](OC(C)=O)C([C@@]13C)[C@]4(C)CCC5=O)=C</chem>    | 260 |        |        |  |
| <b>Furanaspermeroterpene D</b>                                                                                                   | SK– | 526.58 | 122.29 |  |
| <chem>O=C(OC)C[C@@]1([C@]2(C)C([C@@]3(C)C4C(C)(C)C(C=C3)=O)[C@H](OC(C)=O)C([C@]15C)=C)C(OC2C4=O)=C(C)OC5=O</chem>                | 261 |        |        |  |
| <b>Furanaspermeroterpene E</b>                                                                                                   | SK– | 574.62 | 151.75 |  |
| <chem>O=C(OC)C[C@@]1([C@]2(C)C([C@@]3(C)C4C(C)(C)C(C[C@H]3OC)=O)[C@H](OC(C)=O)C([C@]15C)=C)C(O[C@@]2(O)C4=O)=C(C)OC5=O</chem>    | 262 |        |        |  |
| <b>Furanaspermeroterpene F</b>                                                                                                   | SK– | 502.56 | 144.28 |  |
| <chem>O=C(OC)C[C@@]1([C@](C(C(O)=C2C(C)(C)C(CC[C@]23C)=O)=O)(C)C3[C@H](O)C([C@]14C)=C)C([C@@H](C)OC4=O)=O</chem>                 | 263 |        |        |  |
| <b>Furanaspermeroterpene G</b>                                                                                                   | SK– | 574.62 | 159.59 |  |
| <chem>O=C(OC)C[C@@]1([C@](C(C(O)=C2C(C)(C)C(C[C@@H](OC)[C@]23C)=O)=O)(C)C3[C@H](OC(C)=O)C([C@]14C)=C)C([C@@H](C)OC4=O)=O</chem>  | 264 |        |        |  |
| <b>Furanaspermeroterpene H</b>                                                                                                   | SK– | 588.65 | 159.59 |  |
| <chem>O=C(OC)C[C@@]1([C@](C(C(O)=C2C(C)(C)C(C[C@@H](OCC)[C@]23C)=O)=O)(C)C3[C@H](OC(C)=O)C([C@]14C)=C)C([C@@H](C)OC4=O)=O</chem> | 265 |        |        |  |
